# Supplementary material for: Inference of transcription factor binding from cell-free DNA enables tumor subtype prediction and early detection
Source: PubMed Central journal article supplement (PMC6789008; doi:10.1038/s41467-019-12714-4), 2019-10-11
Supplement: 41467_2019_12714_MOESM1_ESM.pdf [file 41467_2019_12714_MOESM1_ESM.pdf]

# Supplementary Information

**Inference of transcription factor binding from cell-free DNA  
enables tumor subtype prediction and early detection**

Ulz et al.

## Supplementary information

|                             |    |
|-----------------------------|----|
| Supplementary Figure 1..... | 3  |
| Supplementary Figure 2..... | 4  |
| Supplementary Figure 3..... | 5  |
| Supplementary Figure 4..... | 6  |
| Supplementary Figure 5..... | 7  |
| Supplementary Figure 6..... | 8  |
| Supplementary Figure 7..... | 9  |
| Supplementary Figure 8..... | 10 |
| Supplementary Figure 9..... | 11 |
| Supplementary Table 1.....  | 12 |
| Supplementary Table 2.....  | 13 |
| Supplementary Table 3.....  | 14 |

## Supplementary Figure 1

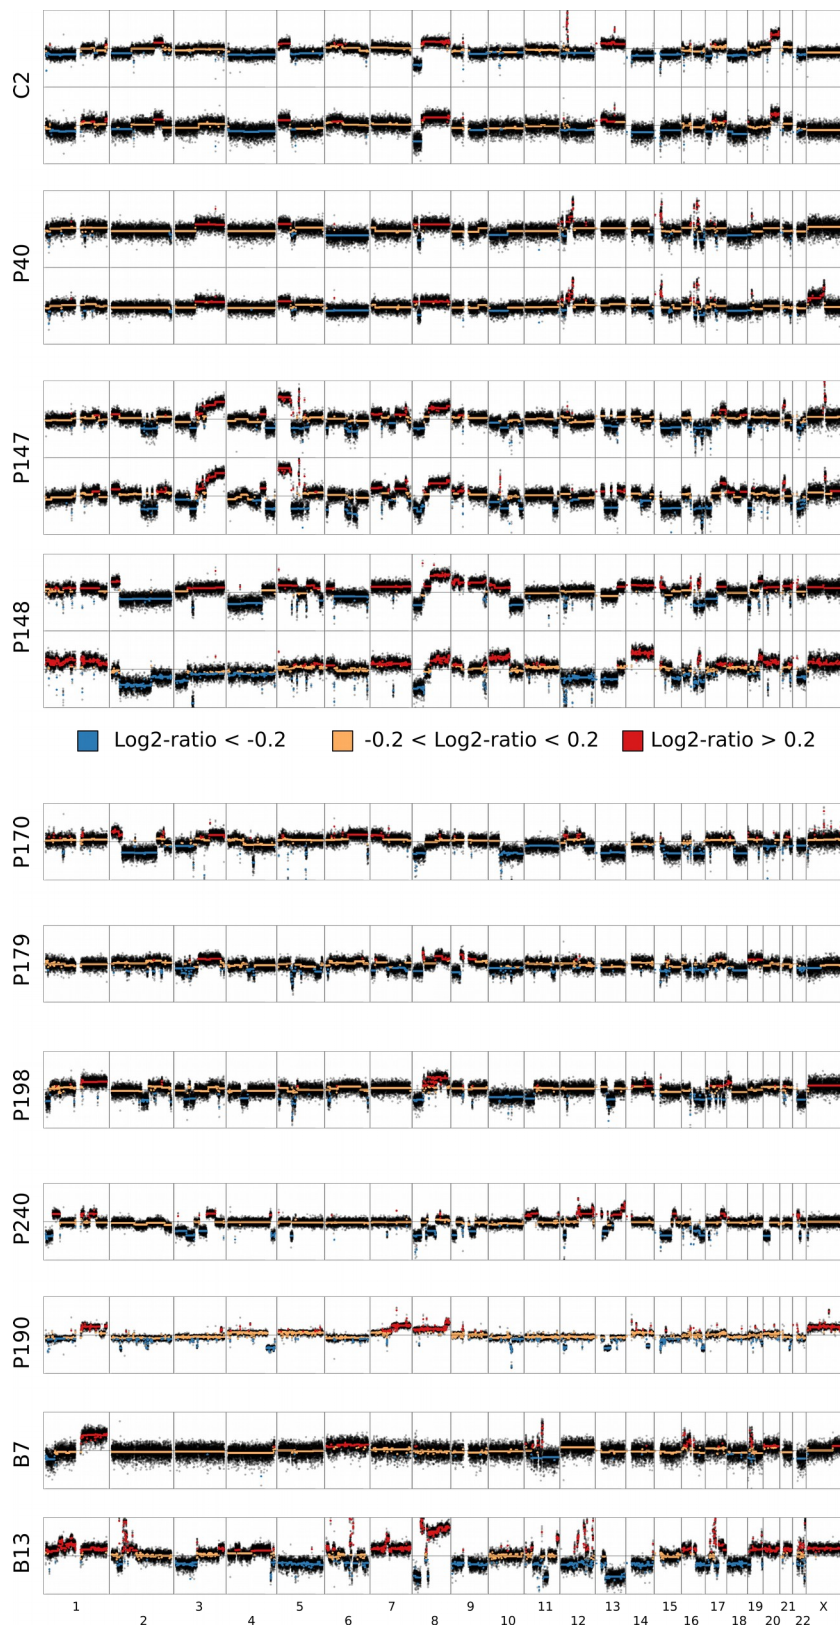

Somatic copy number alterations (SCNAs) in plasma samples from patients with cancer  
SCNAs identified after whole-genome plasma sequencing of plasma samples derived from one patient with colon adenocarcinoma (C2); eight patients with prostate cancer (P40, P147, P148, P170, P179, P198, P240, P190); and two patients with breast cancer (B7, B13).

## Supplementary Figure 2

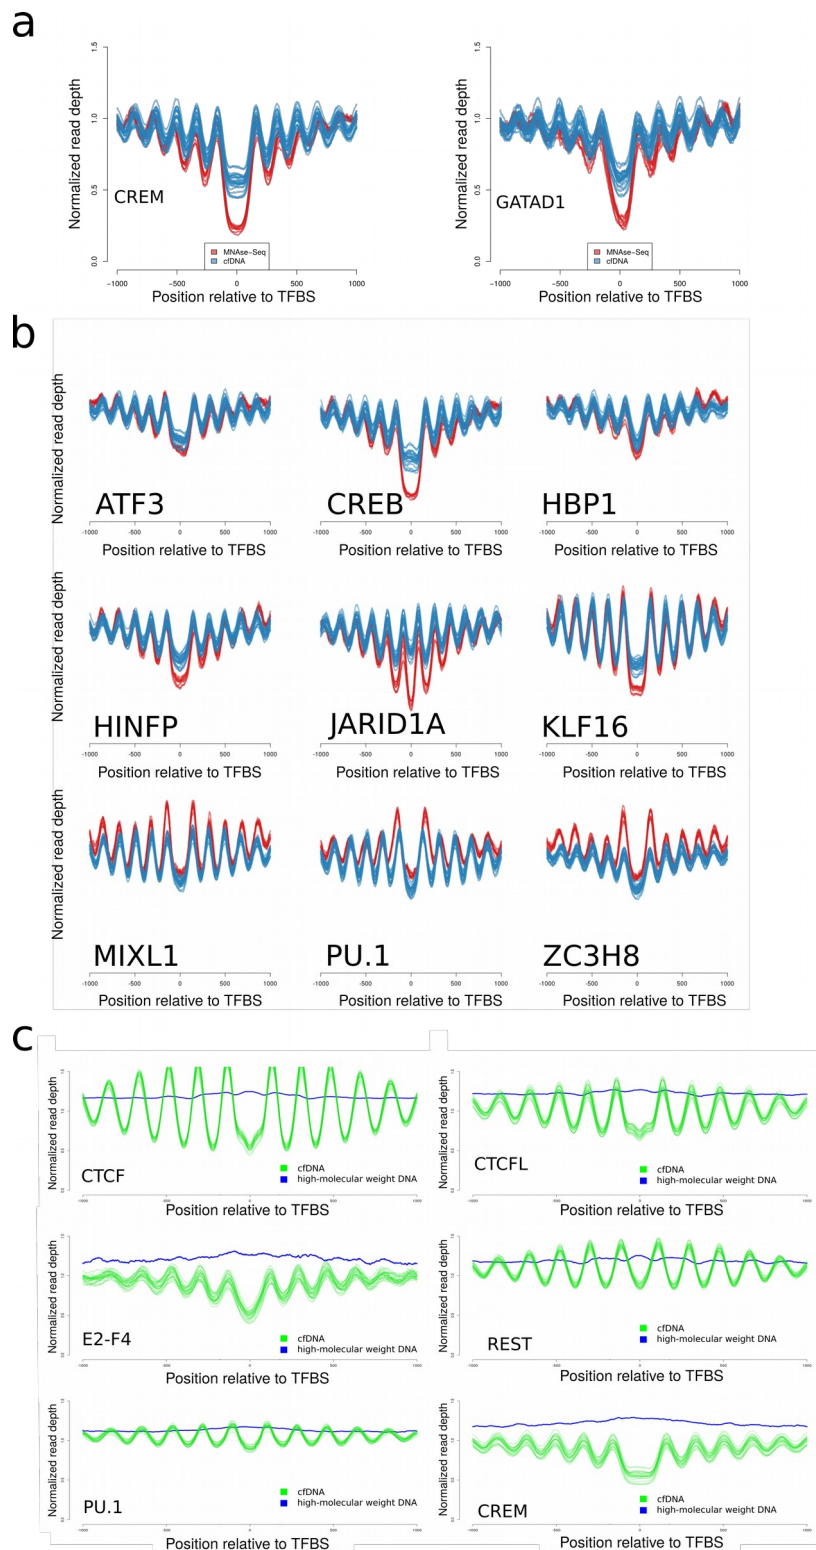

**a)** TFBS-nucleosome coverage profiles for two representative TFs, CREM and GATAD1, established from 24 cfDNA samples from healthy controls, each shown with an individual blue line. The MNase-seq coverage patterns from the lymphoblastoid cell line GM12878 obtained from ENCODE are illustrated in red. **b)** Additional comparisons between coverage profiles of cfDNA and MNase-seq around TFBSs. **c)** TFBS analyses with high-molecular weight DNA, which is not mono-nucleosomal DNA, yields a uniform, non-oscillating pattern (blue) in contrast to plasma DNA (green).

### Supplementary Figure 3

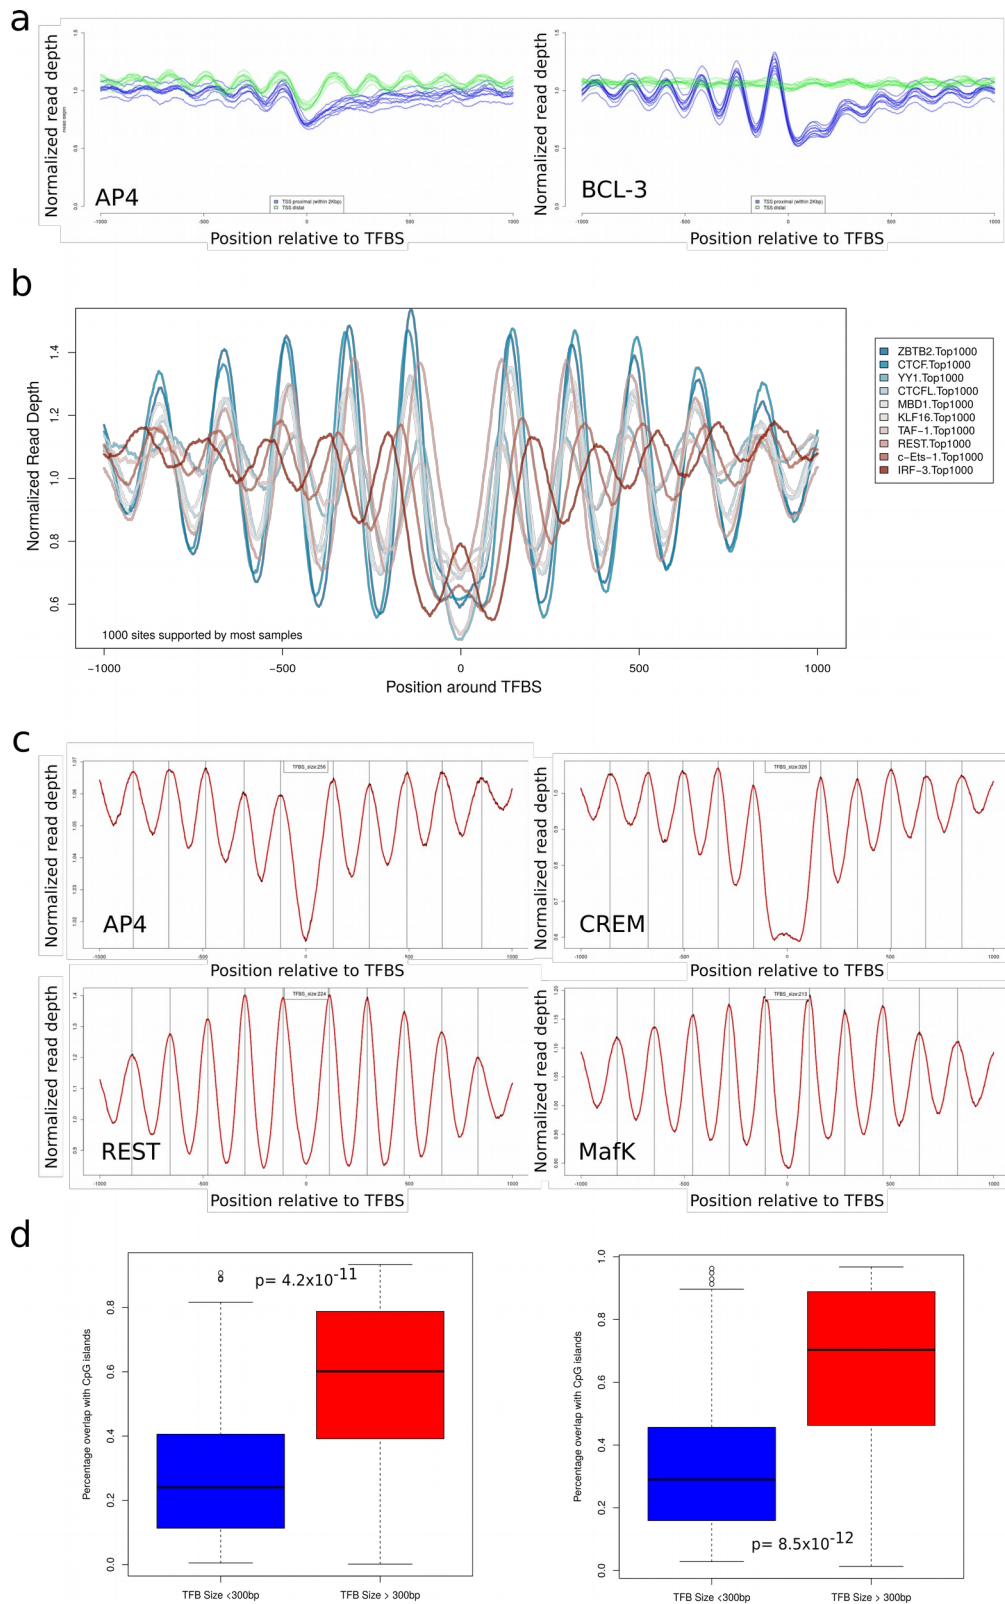

**a)** Coverage profiles for TFs AP-4 and BCL-3 after calculations conducted separately for TFBS within and outside of TSSs. Profiles within TSSs are oriented in a way that the actual transcription start at 0 in the positive direction. **b)** Exemplary TF-nucleosome profiles illustrating the variable nucleosome patterns of different TFs in cfDNA. **c)** Measurements of TFBS widths revealed substantial differences among various TFBSs. **d)** Boxplot illustrating the percentage of overlap for CpG islands (left panel) and TSSs (right panel).

## Supplementary Figure 4

### Normal distribution of z-scores

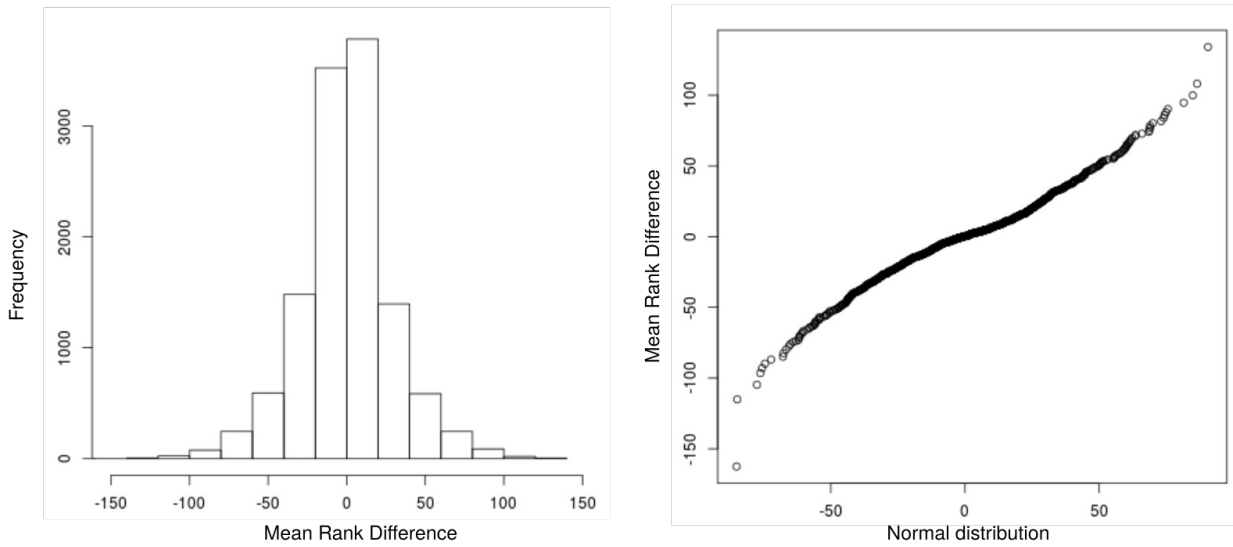

Rank differences of each healthy sample against the remaining healthy samples shows normal distribution as depicted by its distribution (left panel), as well as the QQ-plot (right panel).

## Supplementary Figure 5

### Overall z-scores in high-coverage tumor samples

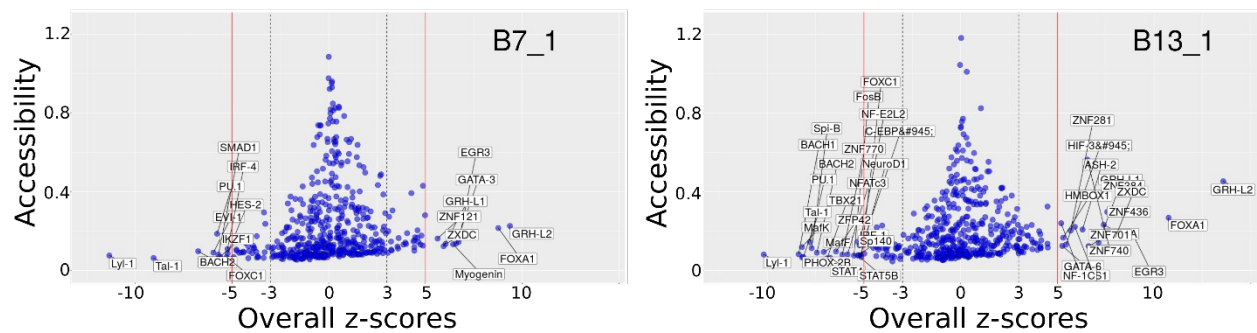

In breast cancer samples B7 and B13 we detected in agreement with the ATAC-seq data increased accessibility for GRHL2, FOXA1, and ZNF121.

## Supplementary Figure 6

### TFBS accessibility in serial analysis

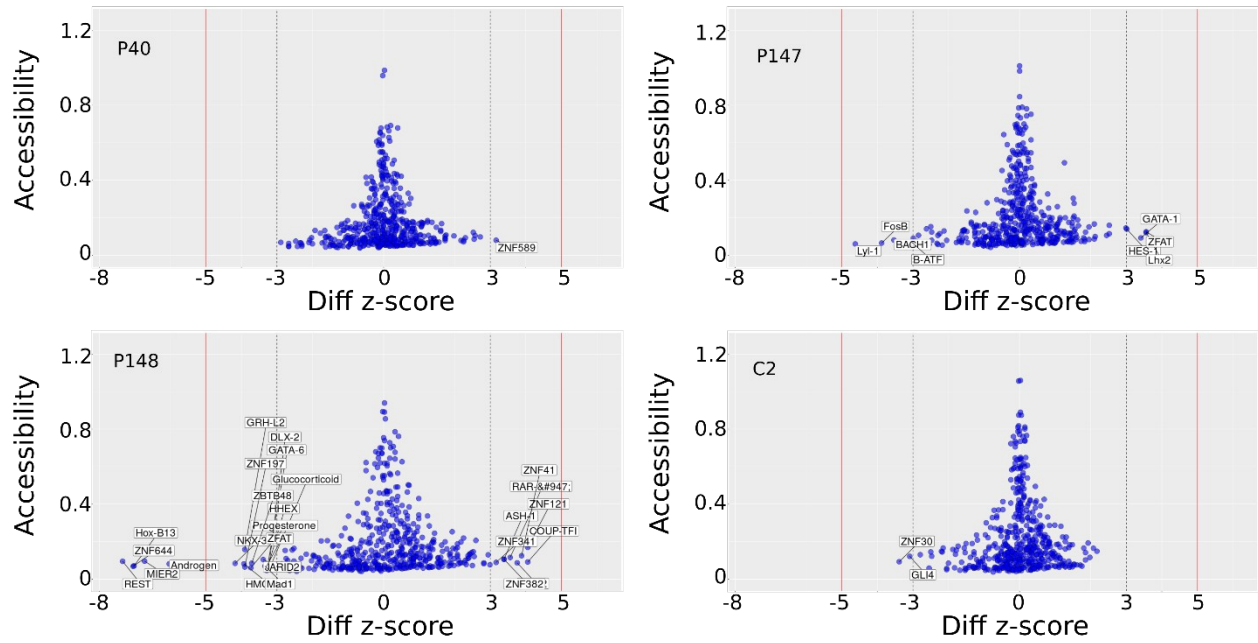

Pairwise comparison of two plasma samples from patients C2, P147, and P40.



## Supplementary Figure 7

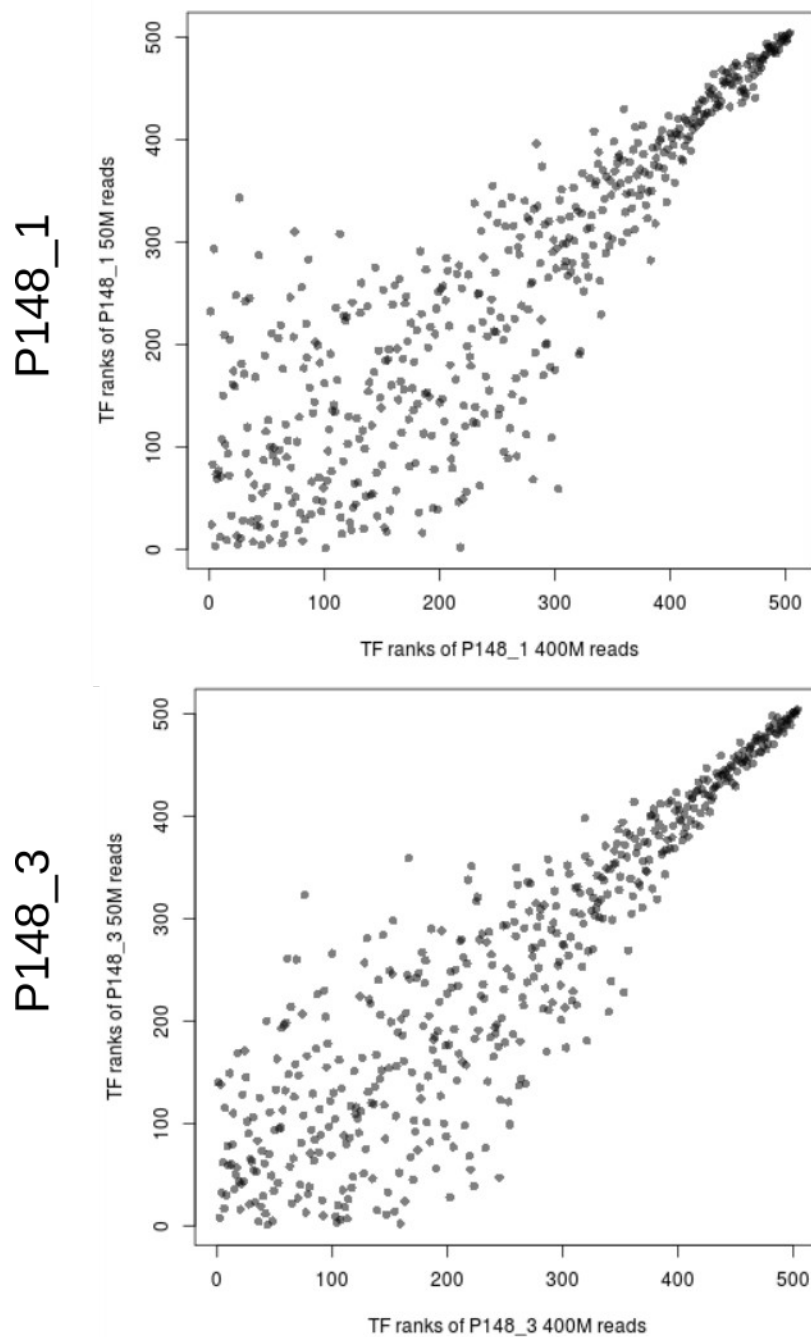

### Down-sampling of plasma samples P148\_1 and P148\_3

Plasma samples P148\_1 (819,607,690 reads) and P148\_3 (768,763,081 reads) were down-sampled to ~50 million reads and analyzed for the 504 TFs used in our study. Lower ranking TFs appear to be more affected by noise.

## Supplementary Figure 8

### Determination of the tumor content with ichorCNA

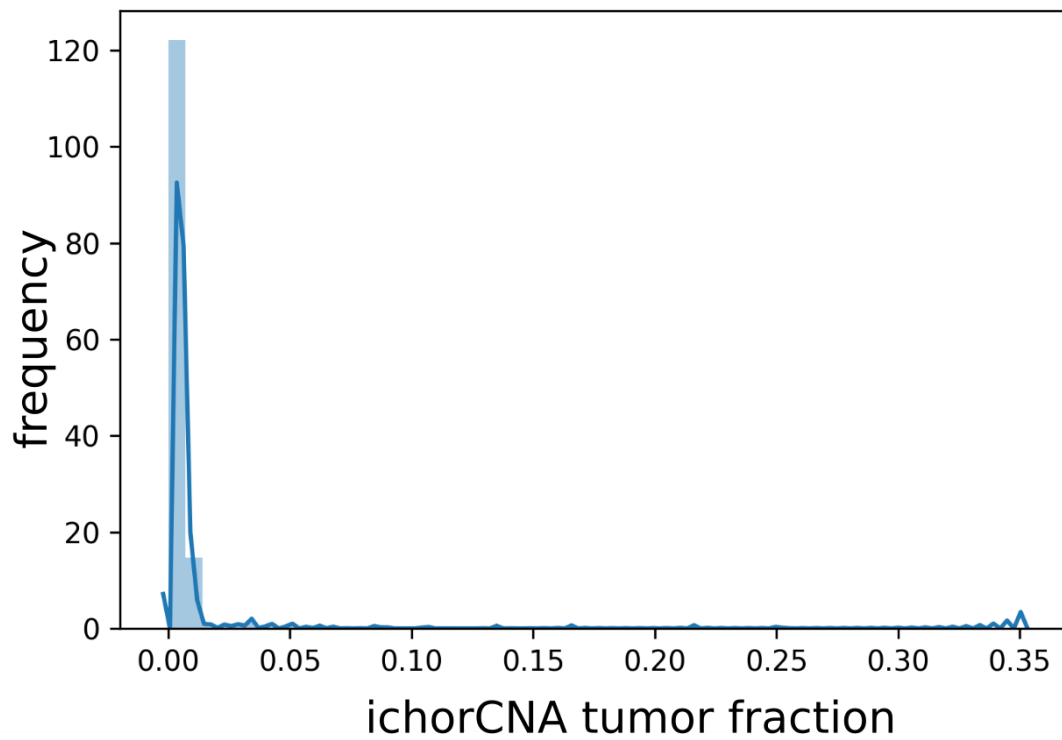

Distribution of tumor fractions as measured by ichorCNA in the Freenome colon cancer cohort. Most samples show a tumor fraction below the limit of detection specified by ichorCNA (3%).

## Supplementary Figure 9

Logistic Regression on all samples from the colon cancer cohort, as well as samples with stage I and II combined

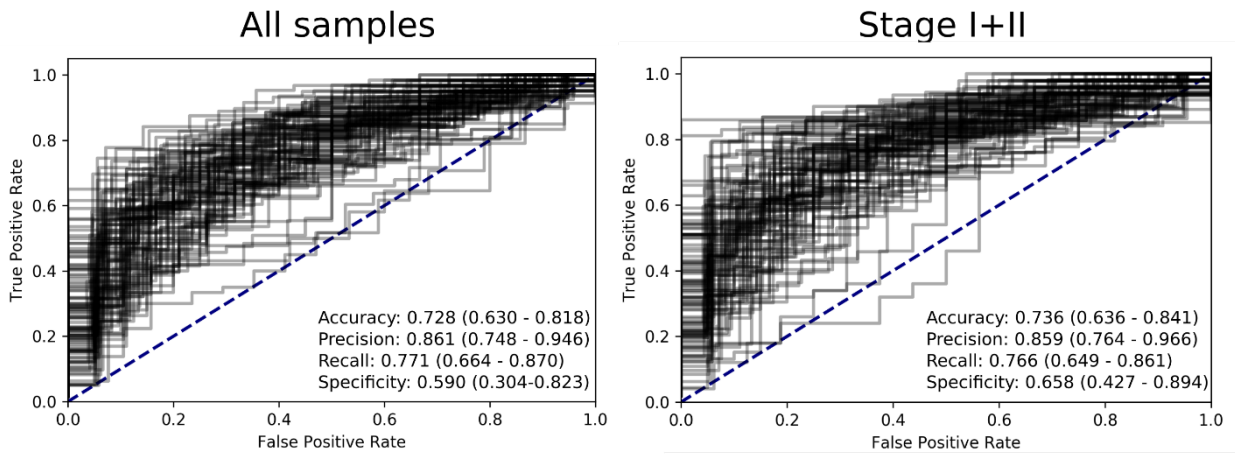

ROC-curves of logistic regression on 100 random training-test splits on accessibilities of 504 samples. The left panel shows all cancer samples, irrespective of stage, combined into a single class, while the right panel show samples at stages I and II. Additional performance metrics are available in Supplementary Table 3.

Prostate cancer patients

| Patient ID | Sample ID | Age (years) | Tumor type                     | Metastatic sites               | Castration Resistance | PSA at diagnosis [ng/ml] | PSA [ng/ml] | NSE [ng/ml] | Treatment            | Previous treatment                      | AR Amplification |
|------------|-----------|-------------|--------------------------------|--------------------------------|-----------------------|--------------------------|-------------|-------------|----------------------|-----------------------------------------|------------------|
| P240       | P240_1    | 67.5        | Neuroendocrine                 | Bone, lymph nodes, liver, lung | Yes                   | NA                       | 3.2         | 542.4       | Carboplatin/Etoposid | ADT, Chemotherapy                       | No               |
| P198       | P198_5    | 65.1        | Neuroendocrine                 | Bone, lymph nodes              | Yes                   | NA                       | 29.4        | > 370       | ADT                  | ADT, Chemotherapy, Carboplatin/Etoposid | No               |
| P190       | P190_3    | 65.4        | Adenocarcinoma/ Neuroendocrine | Bone                           | Yes                   | NA                       | 3.35        | 19.4        | Carboplatin/Etoposid | ADT, Chemotherapy                       | No               |
| P179       | P179_4    | 64.9        | Neuroendocrine                 | Bone, lymph nodes              | Yes                   | 15.0                     | 0.56        | 55.6*       | Chemotherapy         | ADT                                     | No               |
| P170       | P170_2    | 72.4        | Neuroendocrine                 | Bone, lung, liver              | Yes                   | NA                       | 3.81        | 122.6       | Carboplatin/Etoposid | ADT, Chemotherapy                       | No               |
| P148       | P148_3    | 66.0        | Neuroendocrine                 | Bone, liver, lymph nodes       | Yes                   | NA                       | 52.0        | > 370       | Carboplatin/Etoposid | Chemotherapy                            | No               |
|            | P148_1    |             | Adenocarcinoma                 |                                |                       |                          | 694.4       | NA          | Chemotherapy         | ADT                                     | Yes              |
| P147       | P147_3    | 65.5        | Adenocarcinoma                 | Bone, liver, lymph nodes       | Yes                   | 11.4                     | 863.1       | > 370       | Chemotherapy         | ADT, RT                                 | Yes              |
|            | P147_1    |             |                                |                                | Yes                   |                          | 205.7       | NA          |                      |                                         | Yes              |
| P40        | P40_2     | 84.1        | Adenocarcinoma                 | Bone                           | No                    | 425.3                    | 656.0       | NA          | ADT                  | RT                                      | Yes              |
|            | P40_1     |             |                                |                                | No                    |                          | 115.3       | NA          |                      |                                         | No               |

Breast cancer patients

| Patient ID | Sample ID | Age (years)       | Tumor type | Her2 | ER+ | PR+low | PR+ |
|------------|-----------|-------------------|------------|------|-----|--------|-----|
| B7         | B7_1      | 54.48611111111111 | luminal    | 1    | 1   | 1      |     |
| B13        | B13_1     | 75.43055555555555 | luminal    | 1    | 1   |        | 1   |

Colon cancer patient

| Patient ID | Sample ID | Age (years) | Tumor type     | Metastatic sites | UICC          |
|------------|-----------|-------------|----------------|------------------|---------------|
| C2         | C2_7      | 48          | Adenocarcinoma | liver            | G3 pT3 N2b V1 |
|            | C2_6      |             |                |                  |               |

Clinical data on prostate cancer patients P40, P147, P148, P190, P170, P179, P198, and P240, on breast cancer patients B7 and B13, and patient C2 with colorectal cancer.

Supplementary Table 1

## Supplementary Table 2

|                      | Control samples  | Cancer samples   |
|----------------------|------------------|------------------|
| <b>n</b>             | 177              | 592              |
| <b>male</b>          | 36.36%           | 51.78%           |
| <b>female</b>        | 63.64%           | 48.22%           |
| <b>stage I</b>       | n/a              | 197              |
| <b>stage II</b>      | n/a              | 280              |
| <b>stage III</b>     | n/a              | 98               |
| <b>stage IV</b>      | n/a              | 6                |
| <b>stage NA</b>      | n/a              | 9                |
| <b>Mean (+/- sd)</b> | 53.1 (+/- 15.98) | 70.6 (+/- 11.50) |

Clinical characteristics of the Freenome colorectal cancer cohort.

### Supplementary Table 3

|                              | Stagel |              | Stagell |              | Stagel+II |              | All Samples |              |
|------------------------------|--------|--------------|---------|--------------|-----------|--------------|-------------|--------------|
|                              | Value  | 95%-Conf Int | Value   | 95%-Conf Int | Value     | 95%-Conf Int | Value       | 95%-Conf Int |
| <b>Samples in Cancer set</b> | 197    |              | 280     |              | 477       |              | 592         |              |
| <b>Accuracy</b>              | 0.718  | 0.565-0.842  | 0.755   | 0.619-0.881  | 0.736     | 0.636-0.841  | 0.728       | 0.630-0.818  |
| <b>Precision</b>             | 0.742  | 0.558-0.905  | 0.838   | 0.689-1.0    | 0.859     | 0.764-0.966  | 0.861       | 0.748-0.946  |
| <b>Recall</b>                | 0.711  | 0.538-0.873  | 0.745   | 0.575-1.0    | 0.766     | 0.649-0.861  | 0.771       | 0.664-0.870  |
| <b>Specificity</b>           | 0.724  | 0.480-0.898  | 0.771   | 0.563-1.0    | 0.658     | 0.427-0.894  | 0.59        | 0.304-0.823  |
| <b>F1</b>                    | 0.721  | 0.558-0.845  | 0.785   | 0.652-0.898  | 0.808     | 0.726-0.893  | 0.812       | 0.738-0.883  |
| <b>MCC</b>                   | 0.436  | 0.123-0.690  | 0.506   | 0.216-0.761  | 0.393     | 0.143-0.643  | 0.327       | 0.048-0.520  |
| <b>AUC</b>                   | 0.793  | 0.664-0.902  | 0.827   | 0.684-0.931  | 0.775     | 0.636-0.895  | 0.762       | 0.602-0.867  |

Performance metrics of logistic regression analysis of TF accessibilities in the Freenome cohort of early-stage colorectal cancer samples.
