# Supplementary material for: Inference of transcription factor binding from cell-free DNA enables tumor subtype prediction and early detection
Source: PubMed Central journal article supplement (PMC6789008; doi:10.1038/s41467-019-12714-4), 2019-10-11
Supplement: 41467_2019_12714_MOESM3_ESM.pdf [file 41467_2019_12714_MOESM3_ESM.pdf]

## Description of Additional Supplementary Files

**File name:** Supplementary Data 1

**Description:** List of 504 TFs used in this study and accompanying information.

**File name:** Supplementary Data 2

**Description:** Ranking order of TF accessibilities for prostate, colon, and breast epithelial tissues established from ATAC-seq data.

**File name:** Supplementary Data 3

**Description:** Overview of samples and sequencing statistics with accompanying information about tumor fractions from ichorCNA.

**File name:** Supplementary Data 4

**Description:** Overall z-scores for individual samples, merged low-coverage samples and downsampled samples of P148.
